# Supplementary material
Source: ML conference proceedings conference paper supplement (https://proceedings.mlr.press/v80/wu18d.html)
Supplement: Supplementary file [file wu18d-supp.pdf]

## 8. Proof for Lemma 2

*Proof.* By re-organizing the update rule of accumulated quantization error, we have:

$$\begin{aligned}
 \mathbf{h}_p^{(t)} &= \beta \mathbf{h}_p^{(t-1)} + (\mathbf{g}_p^{(t-1)} - \tilde{\mathbf{g}}_p^{(t-1)}) \\
 &= \beta \mathbf{h}_p^{(t-1)} + (-\alpha \mathbf{h}_p^{(t-1)} - \boldsymbol{\varepsilon}_p^{(t-1)}) \\
 &= (\beta - \alpha) \cdot \mathbf{h}_p^{(t-1)} - \boldsymbol{\varepsilon}_p^{(t-1)} \\
 &= - \sum_{t'=0}^{t-1} (\beta - \alpha)^{t-t'-1} \cdot \boldsymbol{\varepsilon}_p^{(t')}
 \end{aligned} \tag{27}$$

which indicates that  $\mathbf{h}_p^{(t)}$  is the linear combination of all the previous quantization errors.

Taking the expectation of squared  $l_2$ -norm of both sides of the second to the last equality in (27), we have:

$$\begin{aligned}
 \mathbb{E} \|\mathbf{h}_p^{(t)}\|_2^2 &= \mathbb{E} \|(\beta - \alpha) \cdot \mathbf{h}_p^{(t-1)} - \boldsymbol{\varepsilon}_p^{(t-1)}\|_2^2 \\
 &= (\beta - \alpha)^2 \cdot \mathbb{E} \|\mathbf{h}_p^{(t-1)}\|_2^2 + \mathbb{E} \|\boldsymbol{\varepsilon}_p^{(t-1)}\|_2^2
 \end{aligned} \tag{28}$$

and the last equality holds due to the independence between  $\mathbf{h}_p^{(t-1)}$  and  $\boldsymbol{\varepsilon}_p^{(t-1)}$  (recall that all quantization errors are *i.i.d.* random noises).

Since the quantization error  $\boldsymbol{\varepsilon}_p^{(t-1)}$  have the following variance bound (from Theorem 1):

$$\begin{aligned}
 \mathbb{E} \|\boldsymbol{\varepsilon}_p^{(t-1)}\|_2^2 &\leq \gamma \cdot \mathbb{E} \|\mathbf{g}_p^{(t-1)} + \alpha \mathbf{h}_p^{(t-1)}\|_2^2 \\
 &= \gamma \cdot \mathbb{E} \|\mathbf{g}_p^{(t-1)}\|_2^2 + \alpha^2 \gamma \cdot \mathbb{E} \|\mathbf{h}_p^{(t-1)}\|_2^2 \\
 &\leq \gamma B + \alpha^2 \gamma \cdot \mathbb{E} \|\mathbf{h}_p^{(t-1)}\|_2^2
 \end{aligned} \tag{29}$$

where the second equality is also derived from the independence between  $\mathbf{g}_p^{(t-1)}$  and  $\mathbf{h}_p^{(t-1)}$ .

By substituting (29) into (28), we have:

$$\begin{aligned}
 \mathbb{E} \|\mathbf{h}_p^{(t)}\|_2^2 &\leq [\alpha^2 \gamma + (\beta - \alpha)^2] \cdot \mathbb{E} \|\mathbf{h}_p^{(t-1)}\|_2^2 + \gamma B \\
 &\leq \sum_{t'=0}^{t-1} [\alpha^2 \gamma + (\beta - \alpha)^2]^{t-t'-1} \cdot \gamma B \\
 &= \frac{1 - \lambda^t}{1 - \lambda} \cdot \gamma B
 \end{aligned} \tag{30}$$

where  $\lambda = \alpha^2 \gamma + (\beta - \alpha)^2$ .

By substituting (30) into the variance bound of quantization error at the  $t$ -th iteration, we have:

$$\begin{aligned}
 \mathbb{E} \|\boldsymbol{\varepsilon}_p^{(t)}\|_2^2 &\leq \gamma B + \alpha^2 \gamma \cdot \mathbb{E} \|\mathbf{h}_p^{(t)}\|_2^2 \\
 &\leq \left[ 1 + \alpha^2 \gamma \cdot \frac{1 - \lambda^t}{1 - \lambda} \right] \cdot \gamma B
 \end{aligned} \tag{31}$$

which completes the proof.  $\square$

## 9. Proof for Theorem 1

*Proof.* Recall the update rule in ECQ-SGD:

$$\mathbf{w}^{(t+1)} = \mathbf{w}^{(t)} - \eta(\mathbf{A}\mathbf{w}^{(t)} + \mathbf{b} + \boldsymbol{\xi}^{(t)} + \alpha \mathbf{h}^{(t)} + \boldsymbol{\varepsilon}^{(t)}) \tag{32}$$

By applying the optimality of  $\mathbf{w}^*$ , and subtracting  $\mathbf{w}^*$  from both sides of the above equality, we arrive at (note that we introduce  $\mathbf{H} = \mathbf{I} - \eta\mathbf{A}$  for simplicity):

$$\begin{aligned}
 \mathbf{w}^{(t+1)} - \mathbf{w}^* &= \mathbf{H}(\mathbf{w}^{(t)} - \mathbf{w}^*) - \eta(\boldsymbol{\xi}^{(t)} + \alpha \mathbf{h}^{(t)} + \boldsymbol{\varepsilon}^{(t)}) \\
 &= \mathbf{H}^{t+1}(\mathbf{w}^{(0)} - \mathbf{w}^*) - \boldsymbol{\Psi}^{(t)} - \boldsymbol{\Phi}^{(t)}
 \end{aligned} \tag{33}$$

where:

$$\begin{aligned}\Psi^{(t)} &= \eta \sum_{t'=0}^t \mathbf{H}^{t-t'} \xi^{(t')} \\ \Phi^{(t)} &= \eta \sum_{t'=0}^t \mathbf{H}^{t-t'} (\alpha \mathbf{h}^{(t')} + \varepsilon^{(t')})\end{aligned}\quad (34)$$

Since each accumulated quantization error  $\mathbf{h}^{(t')}$  is the linear combination of all previous quantization errors:

$$\mathbf{h}^{(t')} = \sum_{t''=0}^{t'-1} (\beta - \alpha)^{t'-t''-1} \cdot \varepsilon^{(t'')} \quad (35)$$

we can further simplify  $\Phi^{(t)}$  as:

$$\Phi^{(t)} = \eta \sum_{t'=0}^t \Theta^{(t')} \varepsilon^{(t')} \quad (36)$$

where:

$$\Theta^{(t')} = \mathbf{H}^{t-t'} - \sum_{t''=t'+1}^t \alpha (\beta - \alpha)^{t''-t'-1} \mathbf{H}^{t-t''} \quad (37)$$

Due to the independence between all the random noises ( $\{\xi^{(t')}\}$  and  $\{\varepsilon^{(t')}\}$ ), the expectation of squared Euclidean distance between  $\mathbf{w}^{(t+1)}$  and  $\mathbf{w}^*$  is bounded by:

$$\begin{aligned}\mathbb{E} \|\mathbf{w}^{(t+1)} - \mathbf{w}^*\|_2^2 &= \mathbb{E} \|\mathbf{H}^{t+1}(\mathbf{w}^{(0)} - \mathbf{w}^*)\|_2^2 + \eta^2 \sum_{t'=0}^t \left[ \mathbb{E} \|\mathbf{H}^{t-t'} \xi^{(t')}\|_2^2 + \mathbb{E} \|\Theta^{(t')} \varepsilon^{(t')}\|_2^2 \right] \\ &\leq R^2 \|\mathbf{H}^{t+1}\|_2^2 + \eta^2 \sigma^2 \sum_{t'=0}^t \|\mathbf{H}^{t'}\|_2^2 + \eta^2 \mathbb{E} \|\varepsilon^{(t)}\|_2^2 + \eta^2 \sum_{t'=0}^{t-1} \|\Theta^{(t')}\|_2^2 \cdot \mathbb{E} \|\varepsilon^{(t')}\|_2^2\end{aligned}\quad (38)$$

which completes the proof.  $\square$

## 10. Proof for Lemma 3

*Proof.* Since  $\mathbf{A} \succeq a_1 \mathbf{I}$ , and the learning rate satisfies  $\eta a_1 < 1$ , we have  $\mathbf{I} - \eta \mathbf{A} \preceq (1 - \eta a_1) \mathbf{I}$ , which implies that  $(\mathbf{I} - \eta \mathbf{A})^{t''} \preceq (1 - \eta a_1)^{t''} \mathbf{I}$  holds for any positive integer  $t''$ . Therefore, we can derive the following inequality:

$$\begin{aligned}(\mathbf{I} - \eta \mathbf{A})^t &= (\mathbf{I} - \eta \mathbf{A})^{t-t'} (\mathbf{I} - \eta \mathbf{A})^{t'} \\ &\preceq (1 - \eta a_1)^{t-t'} (\mathbf{I} - \eta \mathbf{A})^{t'}\end{aligned}\quad (39)$$

By substituting the above inequality into the definition of  $\Theta^{(t')}$  ( $t' < t$ ), we arrive at:

$$\begin{aligned}\Theta^{(t')} &\preceq \left[ 1 - \sum_{t''=t'+1}^t \frac{\alpha (\beta - \alpha)^{t''-t'-1}}{(1 - \eta a_1)^{t''-t'}} \right] \cdot (\mathbf{I} - \eta \mathbf{A})^{t-t'} \\ &= \left[ 1 - \frac{\alpha}{\beta - \alpha} \sum_{t''=1}^{t-t'} \left( \frac{\beta - \alpha}{1 - \eta a_1} \right)^{t''} \right] \cdot (\mathbf{I} - \eta \mathbf{A})^{t-t'} \\ &= \left[ 1 - \frac{\alpha}{1 - \eta a_1} \frac{1 - \nu^{t-t'}}{1 - \nu} \right] \cdot (\mathbf{I} - \eta \mathbf{A})^{t-t'}\end{aligned}\quad (40)$$

where  $\nu = (\beta - \alpha)/(1 - \eta a_1)$ .  $\square$

## 11. Proof for Lemma 4

*Proof.* Here we use  $\Delta t = t - t'$  to denote the time gap. With  $\beta = 1 - \eta a_1$  and  $0 < \alpha < \beta$ , we have  $\nu = \frac{\beta - \alpha}{1 - \eta a_1} \in (0, 1)$ , which leads to:

$$\lim_{\Delta t \rightarrow \infty} \nu^{\Delta t} = 0 \quad (41)$$

Recall that the upper bound of reduction ratio is given by:

$$\frac{\tau^{(t-\Delta t)}}{\tau_{QSGD}^{(t-\Delta t)}} < \left(1 - \frac{\alpha}{1 - \eta a_1} \cdot \frac{1 - \nu^{\Delta t}}{1 - \nu}\right)^2 \cdot \left(1 + \frac{\alpha^2 \gamma}{1 - \lambda}\right) \quad (42)$$

and substituting  $\beta = 1 - \eta a_1$  into it, we arrive at:

$$\lim_{\Delta t \rightarrow \infty} \frac{\tau^{(t-\Delta t)}}{\tau_{QSGD}^{(t-\Delta t)}} = \left(1 - \frac{\alpha}{1 - \eta a_1} \cdot \frac{1}{1 - \frac{1 - \eta a_1 - \alpha}{1 - \eta a_1}}\right)^2 \cdot \left(1 + \frac{\alpha^2 \gamma}{1 - \lambda}\right) = 0 \quad (43)$$

which completes the proof. □
